# Supplementary material for: Cellular Antioxidant Effect of Four Bromophenols from the Red Algae, Vertebrata lanosa
Source: MDPI journal article supplement (doi:10.3390/md11082769), 2013-08-05
Supplement: s2 [file s2]

marinedrugs-11-02769-s001.mol
  corina  04141402443D 1   1.00000     0.00000 
CORINA 3.49 0023  12.04.2013
 12 12  0  0  0  0  0  0  0  0999 V2000
   -0.0166    1.3758    0.0096 C   0  0  0  0  0  0  0  0  0  0  0  0
    0.0021   -0.0041    0.0020 C   0  0  0  0  0  0  0  0  0  0  0  0
    1.2186   -0.6863   -0.0128 C   0  0  0  0  0  0  0  0  0  0  0  0
    2.4156    0.0191   -0.0200 C   0  0  0  0  0  0  0  0  0  0  0  0
    2.4071    1.3978   -0.0129 C   0  0  0  0  0  0  0  0  0  0  0  0
    1.1886    2.0894    0.0019 C   0  0  0  0  0  0  0  0  0  0  0  0
    1.1752    3.5573    0.0090 C   0  0  0  0  0  0  0  0  0  0  0  0
   -1.1668   -0.6995    0.0094 O   0  0  0  0  0  0  0  0  0  0  0  0
    1.2331   -2.0438   -0.0198 O   0  0  0  0  0  0  0  0  0  0  0  0
    4.0603   -0.9140   -0.0388 Br  0  0  0  0  0  0  0  0  0  0  0  0
    4.0383    2.3544   -0.0221 Br  0  0  0  0  0  0  0  0  0  0  0  0
    2.2201    4.1734    0.0019 O   0  0  0  0  0  0  0  0  0  0  0  0
  1  2  1  0      
  2  3  2  0      
  3  4  1  0      
  4  5  2  0      
  5  6  1  0      
  6  1  2  0      
  6  7  1  0      
  2  8  1  0      
  3  9  1  0      
  4 10  1  0      
  5 11  1  0      
  7 12  2  0      
M  END
$$$$
