# Supplementary material for: Cellular Antioxidant Effect of Four Bromophenols from the Red Algae, Vertebrata lanosa
Source: MDPI journal article supplement (doi:10.3390/md11082769), 2013-08-05
Supplement: s4 [file s4]

marinedrugs-11-02769-s002.mol
  corina  04141402443D 1   1.00000     0.00000 
CORINA 3.49 0023  12.04.2013
 22 23  0  0  0  0  0  0  0  0999 V2000
    2.5425    4.4775   -1.8387 C   0  0  0  0  0  0  0  0  0  0  0  0
    2.8101    5.4472   -2.7919 C   0  0  0  0  0  0  0  0  0  0  0  0
    1.9709    6.5500   -2.9133 C   0  0  0  0  0  0  0  0  0  0  0  0
    0.8698    6.6745   -2.0801 C   0  0  0  0  0  0  0  0  0  0  0  0
    0.6081    5.7027   -1.1303 C   0  0  0  0  0  0  0  0  0  0  0  0
    1.4434    4.6066   -1.0103 C   0  0  0  0  0  0  0  0  0  0  0  0
    3.8917    5.3211   -3.6069 O   0  0  0  0  0  0  0  0  0  0  0  0
    2.2302    7.5042   -3.8472 O   0  0  0  0  0  0  0  0  0  0  0  0
   -0.2735    8.1721   -2.2410 Br  0  0  0  0  0  0  0  0  0  0  0  0
   -0.8939    5.8735    0.0058 Br  0  0  0  0  0  0  0  0  0  0  0  0
    1.1544    3.5508    0.0255 C   0  0  0  0  0  0  0  0  0  0  0  0
    1.5244    4.0716    1.3904 C   0  0  0  0  0  0  0  0  0  0  0  0
    2.8418    4.3732    1.6796 C   0  0  0  0  0  0  0  0  0  0  0  0
    3.9051    4.1809    0.6291 C   0  0  0  0  0  0  0  0  0  0  0  0
    0.5438    4.2523    2.3495 C   0  0  0  0  0  0  0  0  0  0  0  0
    0.8829    4.7312    3.6052 C   0  0  0  0  0  0  0  0  0  0  0  0
    2.2104    5.0292    3.8975 C   0  0  0  0  0  0  0  0  0  0  0  0
    3.1864    4.8513    2.9305 C   0  0  0  0  0  0  0  0  0  0  0  0
    5.1912    4.4215    1.2035 O   0  0  0  0  0  0  0  0  0  0  0  0
   -0.0797    4.9099    4.5494 O   0  0  0  0  0  0  0  0  0  0  0  0
   -1.2588    3.8464    1.9473 Br  0  0  0  0  0  0  0  0  0  0  0  0
    2.5481    5.4998    5.1279 O   0  0  0  0  0  0  0  0  0  0  0  0
  1  2  1  0      
  2  3  2  0      
  3  4  1  0      
  4  5  2  0      
  5  6  1  0      
  6  1  2  0      
  2  7  1  0      
  3  8  1  0      
  4  9  1  0      
  5 10  1  0      
  6 11  1  0      
 11 12  1  0      
 12 13  2  0      
 13 14  1  0      
 12 15  1  0      
 15 16  2  0      
 16 17  1  0      
 17 18  2  0      
 18 13  1  0      
 14 19  1  0      
 16 20  1  0      
 15 21  1  0      
 17 22  1  0      
M  END
$$$$
