# Supplementary material for: Cellular Antioxidant Effect of Four Bromophenols from the Red Algae, Vertebrata lanosa
Source: MDPI journal article supplement (doi:10.3390/md11082769), 2013-08-05
Supplement: s5 [file s5]

marinedrugs-11-02769-s002.mol
  ChemDraw12271311412D

 22 23  0  0  0  0  0  0  0  0999 V2000
   -0.0656   -0.8250    0.0000 C   0  0  0  0  0  0  0  0  0  0  0  0
   -0.0656   -1.6500    0.0000 C   0  0  0  0  0  0  0  0  0  0  0  0
    0.6489   -2.0625    0.0000 C   0  0  0  0  0  0  0  0  0  0  0  0
    1.3634   -1.6500    0.0000 C   0  0  0  0  0  0  0  0  0  0  0  0
    1.3634   -0.8250    0.0000 C   0  0  0  0  0  0  0  0  0  0  0  0
    0.6489   -0.4125    0.0000 C   0  0  0  0  0  0  0  0  0  0  0  0
   -0.7800   -2.0625    0.0000 O   0  0  0  0  0  0  0  0  0  0  0  0
    0.6489   -2.8875    0.0000 O   0  0  0  0  0  0  0  0  0  0  0  0
    2.0779   -2.0625    0.0000 Br  0  0  0  0  0  0  0  0  0  0  0  0
    1.9468   -0.2416    0.0000 Br  0  0  0  0  0  0  0  0  0  0  0  0
    0.6489    0.4125    0.0000 C   0  0  0  0  0  0  0  0  0  0  0  0
   -0.0656    0.8250    0.0000 C   0  0  0  0  0  0  0  0  0  0  0  0
   -0.7800    0.4125    0.0000 C   0  0  0  0  0  0  0  0  0  0  0  0
   -0.7800   -0.4125    0.0000 C   0  0  0  0  0  0  0  0  0  0  0  0
   -0.0656    1.6500    0.0000 C   0  0  0  0  0  0  0  0  0  0  0  0
   -0.7800    2.0625    0.0000 C   0  0  0  0  0  0  0  0  0  0  0  0
   -1.4945    1.6500    0.0000 C   0  0  0  0  0  0  0  0  0  0  0  0
   -1.4945    0.8250    0.0000 C   0  0  0  0  0  0  0  0  0  0  0  0
   -1.4945   -0.8250    0.0000 O   0  0  0  0  0  0  0  0  0  0  0  0
   -0.7800    2.8875    0.0000 O   0  0  0  0  0  0  0  0  0  0  0  0
    0.6489    2.0625    0.0000 Br  0  0  0  0  0  0  0  0  0  0  0  0
   -2.0779    2.2334    0.0000 O   0  0  0  0  0  0  0  0  0  0  0  0
  1  2  1  0      
  2  3  2  0      
  3  4  1  0      
  4  5  2  0      
  5  6  1  0      
  6  1  2  0      
  2  7  1  0      
  3  8  1  0      
  4  9  1  0      
  5 10  1  0      
  6 11  1  0      
 11 12  1  0      
 12 13  2  0      
 13 14  1  0      
 12 15  1  0      
 15 16  2  0      
 16 17  1  0      
 17 18  2  0      
 18 13  1  0      
 14 19  1  0      
 16 20  1  0      
 15 21  1  0      
 17 22  1  0      
M  END
