# Supplementary material for: Cellular Antioxidant Effect of Four Bromophenols from the Red Algae, Vertebrata lanosa
Source: MDPI journal article supplement (doi:10.3390/md11082769), 2013-08-05
Supplement: s6 [file s6]

marinedrugs-11-02769-s003.mol
  corina  04141402453D 1   1.00000     0.00000 
CORINA 3.49 0023  12.04.2013
 23 24  0  0  0  0  0  0  0  0999 V2000
   -0.0167    1.3814    0.0096 C   0  0  0  0  0  0  0  0  0  0  0  0
    0.0021   -0.0041    0.0020 C   0  0  0  0  0  0  0  0  0  0  0  0
    1.2177   -0.6808   -0.0133 C   0  0  0  0  0  0  0  0  0  0  0  0
    2.4054    0.0339   -0.0208 C   0  0  0  0  0  0  0  0  0  0  0  0
    2.3797    1.4177   -0.0131 C   0  0  0  0  0  0  0  0  0  0  0  0
    1.1708    2.0894    0.0021 C   0  0  0  0  0  0  0  0  0  0  0  0
   -1.1657   -0.7013    0.0099 O   0  0  0  0  0  0  0  0  0  0  0  0
    1.2406   -2.0407   -0.0203 O   0  0  0  0  0  0  0  0  0  0  0  0
    4.0600   -0.8814   -0.0410 Br  0  0  0  0  0  0  0  0  0  0  0  0
    4.0006    2.3918   -0.0228 Br  0  0  0  0  0  0  0  0  0  0  0  0
    1.1479    3.5962    0.0099 C   0  0  0  0  0  0  0  0  0  0  0  0
   -0.2064    4.0519    0.0255 O   0  0  0  0  0  0  0  0  0  0  0  0
   -0.3409    5.4745    0.0340 C   0  0  0  0  0  0  0  0  0  0  0  0
   -1.8026    5.8408    0.0502 C   0  0  0  0  0  0  0  0  0  0  0  0
   -2.1806    7.1712    0.0606 C   0  0  0  0  0  0  0  0  0  0  0  0
   -0.8623    8.5269    0.0551 Br  0  0  0  0  0  0  0  0  0  0  0  0
   -2.7631    4.8462    0.0488 C   0  0  0  0  0  0  0  0  0  0  0  0
   -4.1076    5.1808    0.0628 C   0  0  0  0  0  0  0  0  0  0  0  0
   -4.4889    6.5188    0.0786 C   0  0  0  0  0  0  0  0  0  0  0  0
   -3.5220    7.5120    0.0745 C   0  0  0  0  0  0  0  0  0  0  0  0
   -4.0353    9.3319    0.0966 Br  0  0  0  0  0  0  0  0  0  0  0  0
   -5.0530    4.2030    0.0605 O   0  0  0  0  0  0  0  0  0  0  0  0
   -5.8076    6.8515    0.0918 O   0  0  0  0  0  0  0  0  0  0  0  0
  1  2  1  0      
  2  3  2  0      
  3  4  1  0      
  4  5  2  0      
  5  6  1  0      
  6  1  2  0      
  2  7  1  0      
  3  8  1  0      
  4  9  1  0      
  5 10  1  0      
  6 11  1  0      
 11 12  1  0      
 12 13  1  0      
 13 14  1  0      
 14 15  2  0      
 15 16  1  0      
 14 17  1  0      
 17 18  2  0      
 18 19  1  0      
 19 20  2  0      
 20 15  1  0      
 20 21  1  0      
 18 22  1  0      
 19 23  1  0      
M  END
$$$$
