# Supplementary material for: Cellular Antioxidant Effect of Four Bromophenols from the Red Algae, Vertebrata lanosa
Source: MDPI journal article supplement (doi:10.3390/md11082769), 2013-08-05
Supplement: s7 [file s7]

marinedrugs-11-02769-s003.mol
  ChemDraw12271311412D

 23 24  0  0  0  0  0  0  0  0999 V2000
    0.3572   -1.4438    0.0000 C   0  0  0  0  0  0  0  0  0  0  0  0
    0.3572   -2.2688    0.0000 C   0  0  0  0  0  0  0  0  0  0  0  0
    1.0717   -2.6813    0.0000 C   0  0  0  0  0  0  0  0  0  0  0  0
    1.7862   -2.2688    0.0000 C   0  0  0  0  0  0  0  0  0  0  0  0
    1.7862   -1.4438    0.0000 C   0  0  0  0  0  0  0  0  0  0  0  0
    1.0717   -1.0313    0.0000 C   0  0  0  0  0  0  0  0  0  0  0  0
   -0.3572   -2.6813    0.0000 O   0  0  0  0  0  0  0  0  0  0  0  0
    1.0717   -3.5063    0.0000 O   0  0  0  0  0  0  0  0  0  0  0  0
    2.5006   -2.6813    0.0000 Br  0  0  0  0  0  0  0  0  0  0  0  0
    2.3695   -0.8604    0.0000 Br  0  0  0  0  0  0  0  0  0  0  0  0
    1.0717   -0.2063    0.0000 C   0  0  0  0  0  0  0  0  0  0  0  0
    0.3572    0.2062    0.0000 O   0  0  0  0  0  0  0  0  0  0  0  0
    0.3572    1.0312    0.0000 C   0  0  0  0  0  0  0  0  0  0  0  0
   -0.3572    1.4438    0.0000 C   0  0  0  0  0  0  0  0  0  0  0  0
   -1.0717    1.0312    0.0000 C   0  0  0  0  0  0  0  0  0  0  0  0
   -1.0717    0.2062    0.0000 Br  0  0  0  0  0  0  0  0  0  0  0  0
   -0.3572    2.2688    0.0000 C   0  0  0  0  0  0  0  0  0  0  0  0
   -1.0717    2.6813    0.0000 C   0  0  0  0  0  0  0  0  0  0  0  0
   -1.7862    2.2688    0.0000 C   0  0  0  0  0  0  0  0  0  0  0  0
   -1.7862    1.4438    0.0000 C   0  0  0  0  0  0  0  0  0  0  0  0
   -2.5006    1.0313    0.0000 Br  0  0  0  0  0  0  0  0  0  0  0  0
   -1.0717    3.5063    0.0000 O   0  0  0  0  0  0  0  0  0  0  0  0
   -2.3695    2.8521    0.0000 O   0  0  0  0  0  0  0  0  0  0  0  0
  1  2  1  0      
  2  3  2  0      
  3  4  1  0      
  4  5  2  0      
  5  6  1  0      
  6  1  2  0      
  2  7  1  0      
  3  8  1  0      
  4  9  1  0      
  5 10  1  0      
  6 11  1  0      
 11 12  1  0      
 12 13  1  0      
 13 14  1  0      
 14 15  2  0      
 15 16  1  0      
 14 17  1  0      
 17 18  2  0      
 18 19  1  0      
 19 20  2  0      
 20 15  1  0      
 20 21  1  0      
 18 22  1  0      
 19 23  1  0      
M  END
