# Supplementary material for: Cellular Antioxidant Effect of Four Bromophenols from the Red Algae, Vertebrata lanosa
Source: MDPI journal article supplement (doi:10.3390/md11082769), 2013-08-05
Supplement: s8 [file s8]

marinedrugs-11-02769-s004.mol
  corina  04141402453D 1   1.00000     0.00000 
CORINA 3.49 0023  12.04.2013
 43 46  0  0  0  0  0  0  0  0999 V2000
    1.4877    1.7280    0.4122 C   0  0  0  0  0  0  0  0  0  0  0  0
    1.6341    0.3501    0.4307 C   0  0  0  0  0  0  0  0  0  0  0  0
    1.3301   -0.3946   -0.7044 C   0  0  0  0  0  0  0  0  0  0  0  0
    0.8818    0.2450   -1.8498 C   0  0  0  0  0  0  0  0  0  0  0  0
    0.7377    1.6213   -1.8618 C   0  0  0  0  0  0  0  0  0  0  0  0
    1.0402    2.3607   -0.7325 C   0  0  0  0  0  0  0  0  0  0  0  0
    2.0747   -0.2732    1.5564 O   0  0  0  0  0  0  0  0  0  0  0  0
    1.4728   -1.7471   -0.6907 O   0  0  0  0  0  0  0  0  0  0  0  0
    0.4679   -0.7628   -3.3954 Br  0  0  0  0  0  0  0  0  0  0  0  0
    0.1267    2.4928   -3.4248 Br  0  0  0  0  0  0  0  0  0  0  0  0
    0.8818    3.8593   -0.7503 C   0  0  0  0  0  0  0  0  0  0  0  0
    1.1300    4.4070    0.6316 C   0  0  0  0  0  0  0  0  0  0  0  0
    2.3947    4.8423    0.9847 C   0  0  0  0  0  0  0  0  0  0  0  0
    3.8100    4.7502   -0.2660 Br  0  0  0  0  0  0  0  0  0  0  0  0
    0.0921    4.4787    1.5417 C   0  0  0  0  0  0  0  0  0  0  0  0
    0.3145    4.9809    2.8105 C   0  0  0  0  0  0  0  0  0  0  0  0
    1.5801    5.4134    3.1728 C   0  0  0  0  0  0  0  0  0  0  0  0
    2.6242    5.3463    2.2555 C   0  0  0  0  0  0  0  0  0  0  0  0
    1.8001    5.9079    4.4204 O   0  0  0  0  0  0  0  0  0  0  0  0
    3.8683    5.7692    2.6066 O   0  0  0  0  0  0  0  0  0  0  0  0
   -1.2852    4.0089    1.1499 C   0  0  0  0  0  0  0  0  0  0  0  0
   -2.1790    4.1828    2.2513 O   0  0  0  0  0  0  0  0  0  0  0  0
   -3.5193    3.7657    1.9835 C   0  0  0  0  0  0  0  0  0  0  0  0
   -5.3461    3.8916   -0.1727 C   0  0  0  0  0  0  0  0  0  0  0  0
   -6.2853    4.0055    0.8352 C   0  0  0  0  0  0  0  0  0  0  0  0
   -6.3033    3.0056    1.9625 C   0  0  0  0  0  0  0  0  0  0  0  0
   -5.7034    3.6289    3.1965 C   0  0  0  0  0  0  0  0  0  0  0  0
   -4.3699    3.9930    3.2066 C   0  0  0  0  0  0  0  0  0  0  0  0
   -5.3278    4.8099   -1.2104 C   0  0  0  0  0  0  0  0  0  0  0  0
   -6.2559    5.8460   -1.2356 C   0  0  0  0  0  0  0  0  0  0  0  0
   -7.1953    5.9558   -0.2220 C   0  0  0  0  0  0  0  0  0  0  0  0
   -7.2083    5.0355    0.8114 C   0  0  0  0  0  0  0  0  0  0  0  0
   -6.4896    3.8407    4.3148 C   0  0  0  0  0  0  0  0  0  0  0  0
   -5.9389    4.4140    5.4504 C   0  0  0  0  0  0  0  0  0  0  0  0
   -4.5951    4.7746    5.4619 C   0  0  0  0  0  0  0  0  0  0  0  0
   -3.8147    4.5648    4.3363 C   0  0  0  0  0  0  0  0  0  0  0  0
   -6.2411    6.7497   -2.2519 O   0  0  0  0  0  0  0  0  0  0  0  0
   -4.4038    4.6988   -2.2022 O   0  0  0  0  0  0  0  0  0  0  0  0
   -8.4902    5.1862    2.1934 Br  0  0  0  0  0  0  0  0  0  0  0  0
   -8.4585    7.3627   -0.2515 Br  0  0  0  0  0  0  0  0  0  0  0  0
   -8.3154    3.3489    4.2941 Br  0  0  0  0  0  0  0  0  0  0  0  0
   -6.7103    4.6235    6.5508 O   0  0  0  0  0  0  0  0  0  0  0  0
   -4.0502    5.3374    6.5736 O   0  0  0  0  0  0  0  0  0  0  0  0
  1  2  1  0      
  2  3  2  0      
  3  4  1  0      
  4  5  2  0      
  5  6  1  0      
  6  1  2  0      
  2  7  1  0      
  3  8  1  0      
  4  9  1  0      
  5 10  1  0      
  6 11  1  0      
 11 12  1  0      
 12 13  2  0      
 13 14  1  0      
 12 15  1  0      
 15 16  2  0      
 16 17  1  0      
 17 18  2  0      
 18 13  1  0      
 17 19  1  0      
 18 20  1  0      
 15 21  1  0      
 21 22  1  0      
 22 23  1  0      
 24 25  2  0      
 25 26  1  0      
 26 27  1  0      
 27 28  2  0      
 28 23  1  0      
 24 29  1  0      
 29 30  2  0      
 30 31  1  0      
 31 32  2  0      
 32 25  1  0      
 27 33  1  0      
 33 34  2  0      
 34 35  1  0      
 35 36  2  0      
 36 28  1  0      
 30 37  1  0      
 29 38  1  0      
 32 39  1  0      
 31 40  1  0      
 33 41  1  0      
 34 42  1  0      
 35 43  1  0      
M  END
$$$$
