# Supplementary material for: Cellular Antioxidant Effect of Four Bromophenols from the Red Algae, Vertebrata lanosa
Source: MDPI journal article supplement (doi:10.3390/md11082769), 2013-08-05
Supplement: s9 [file s9]

marinedrugs-11-02769-s004.mol
  ChemDraw12271311422D

 43 46  0  0  0  0  0  0  0  0999 V2000
   -1.0717   -2.6813    0.0000 C   0  0  0  0  0  0  0  0  0  0  0  0
   -1.0717   -3.5063    0.0000 C   0  0  0  0  0  0  0  0  0  0  0  0
   -0.3572   -3.9188    0.0000 C   0  0  0  0  0  0  0  0  0  0  0  0
    0.3572   -3.5063    0.0000 C   0  0  0  0  0  0  0  0  0  0  0  0
    0.3572   -2.6813    0.0000 C   0  0  0  0  0  0  0  0  0  0  0  0
   -0.3572   -2.2688    0.0000 C   0  0  0  0  0  0  0  0  0  0  0  0
   -1.7862   -3.9188    0.0000 O   0  0  0  0  0  0  0  0  0  0  0  0
   -0.3572   -4.7438    0.0000 O   0  0  0  0  0  0  0  0  0  0  0  0
    1.0717   -3.9188    0.0000 Br  0  0  0  0  0  0  0  0  0  0  0  0
    1.0717   -2.2688    0.0000 Br  0  0  0  0  0  0  0  0  0  0  0  0
   -0.3572   -1.4438    0.0000 C   0  0  0  0  0  0  0  0  0  0  0  0
   -1.0717   -1.0313    0.0000 C   0  0  0  0  0  0  0  0  0  0  0  0
   -1.7862   -1.4438    0.0000 C   0  0  0  0  0  0  0  0  0  0  0  0
   -1.7862   -2.2688    0.0000 Br  0  0  0  0  0  0  0  0  0  0  0  0
   -1.0717   -0.2062    0.0000 C   0  0  0  0  0  0  0  0  0  0  0  0
   -1.7862    0.2063    0.0000 C   0  0  0  0  0  0  0  0  0  0  0  0
   -2.5006   -0.2062    0.0000 C   0  0  0  0  0  0  0  0  0  0  0  0
   -2.5006   -1.0313    0.0000 C   0  0  0  0  0  0  0  0  0  0  0  0
   -3.0840    0.3771    0.0000 O   0  0  0  0  0  0  0  0  0  0  0  0
   -3.2151   -1.4438    0.0000 O   0  0  0  0  0  0  0  0  0  0  0  0
   -0.3572    0.2063    0.0000 C   0  0  0  0  0  0  0  0  0  0  0  0
   -0.3572    1.0313    0.0000 O   0  0  0  0  0  0  0  0  0  0  0  0
    0.3572    1.4438    0.0000 C   0  0  0  0  0  0  0  0  0  0  0  0
    1.0717    1.0313    0.0000 C   0  0  0  0  0  0  0  0  0  0  0  0
    1.7862    1.4438    0.0000 C   0  0  0  0  0  0  0  0  0  0  0  0
    1.7862    2.2688    0.0000 C   0  0  0  0  0  0  0  0  0  0  0  0
    1.0717    2.6813    0.0000 C   0  0  0  0  0  0  0  0  0  0  0  0
    0.3572    2.2688    0.0000 C   0  0  0  0  0  0  0  0  0  0  0  0
    1.0717    0.2063    0.0000 C   0  0  0  0  0  0  0  0  0  0  0  0
    1.7862   -0.2062    0.0000 C   0  0  0  0  0  0  0  0  0  0  0  0
    2.5006    0.2063    0.0000 C   0  0  0  0  0  0  0  0  0  0  0  0
    2.5006    1.0313    0.0000 C   0  0  0  0  0  0  0  0  0  0  0  0
    1.0717    3.5063    0.0000 C   0  0  0  0  0  0  0  0  0  0  0  0
    0.3572    3.9188    0.0000 C   0  0  0  0  0  0  0  0  0  0  0  0
   -0.3572    3.5063    0.0000 C   0  0  0  0  0  0  0  0  0  0  0  0
   -0.3572    2.6813    0.0000 C   0  0  0  0  0  0  0  0  0  0  0  0
    1.7862   -1.0312    0.0000 O   0  0  0  0  0  0  0  0  0  0  0  0
    0.3572   -0.2062    0.0000 O   0  0  0  0  0  0  0  0  0  0  0  0
    3.2151    1.4438    0.0000 Br  0  0  0  0  0  0  0  0  0  0  0  0
    3.2151   -0.2062    0.0000 Br  0  0  0  0  0  0  0  0  0  0  0  0
    1.7862    3.9188    0.0000 Br  0  0  0  0  0  0  0  0  0  0  0  0
    0.3572    4.7438    0.0000 O   0  0  0  0  0  0  0  0  0  0  0  0
   -1.0717    3.9188    0.0000 O   0  0  0  0  0  0  0  0  0  0  0  0
  1  2  1  0      
  2  3  2  0      
  3  4  1  0      
  4  5  2  0      
  5  6  1  0      
  6  1  2  0      
  2  7  1  0      
  3  8  1  0      
  4  9  1  0      
  5 10  1  0      
  6 11  1  0      
 11 12  1  0      
 12 13  2  0      
 13 14  1  0      
 12 15  1  0      
 15 16  2  0      
 16 17  1  0      
 17 18  2  0      
 18 13  1  0      
 17 19  1  0      
 18 20  1  0      
 15 21  1  0      
 21 22  1  0      
 22 23  1  0      
 24 25  2  0      
 25 26  1  0      
 26 27  1  0      
 27 28  2  0      
 28 23  1  0      
 24 29  1  0      
 29 30  2  0      
 30 31  1  0      
 31 32  2  0      
 32 25  1  0      
 27 33  1  0      
 33 34  2  0      
 34 35  1  0      
 35 36  2  0      
 36 28  1  0      
 30 37  1  0      
 29 38  1  0      
 32 39  1  0      
 31 40  1  0      
 33 41  1  0      
 34 42  1  0      
 35 43  1  0      
M  END
