# Supplementary material for: Cellular Antioxidant Effect of Four Bromophenols from the Red Algae, Vertebrata lanosa
Source: Mar Drugs. 2013 Aug 5;11(8):2769–84. doi: 10.3390/md11082769 (PMC3766864; doi:10.3390/md11082769)

# Supplementary Materials

**Figure S1.** High resolution MS spectra of compound **4**.

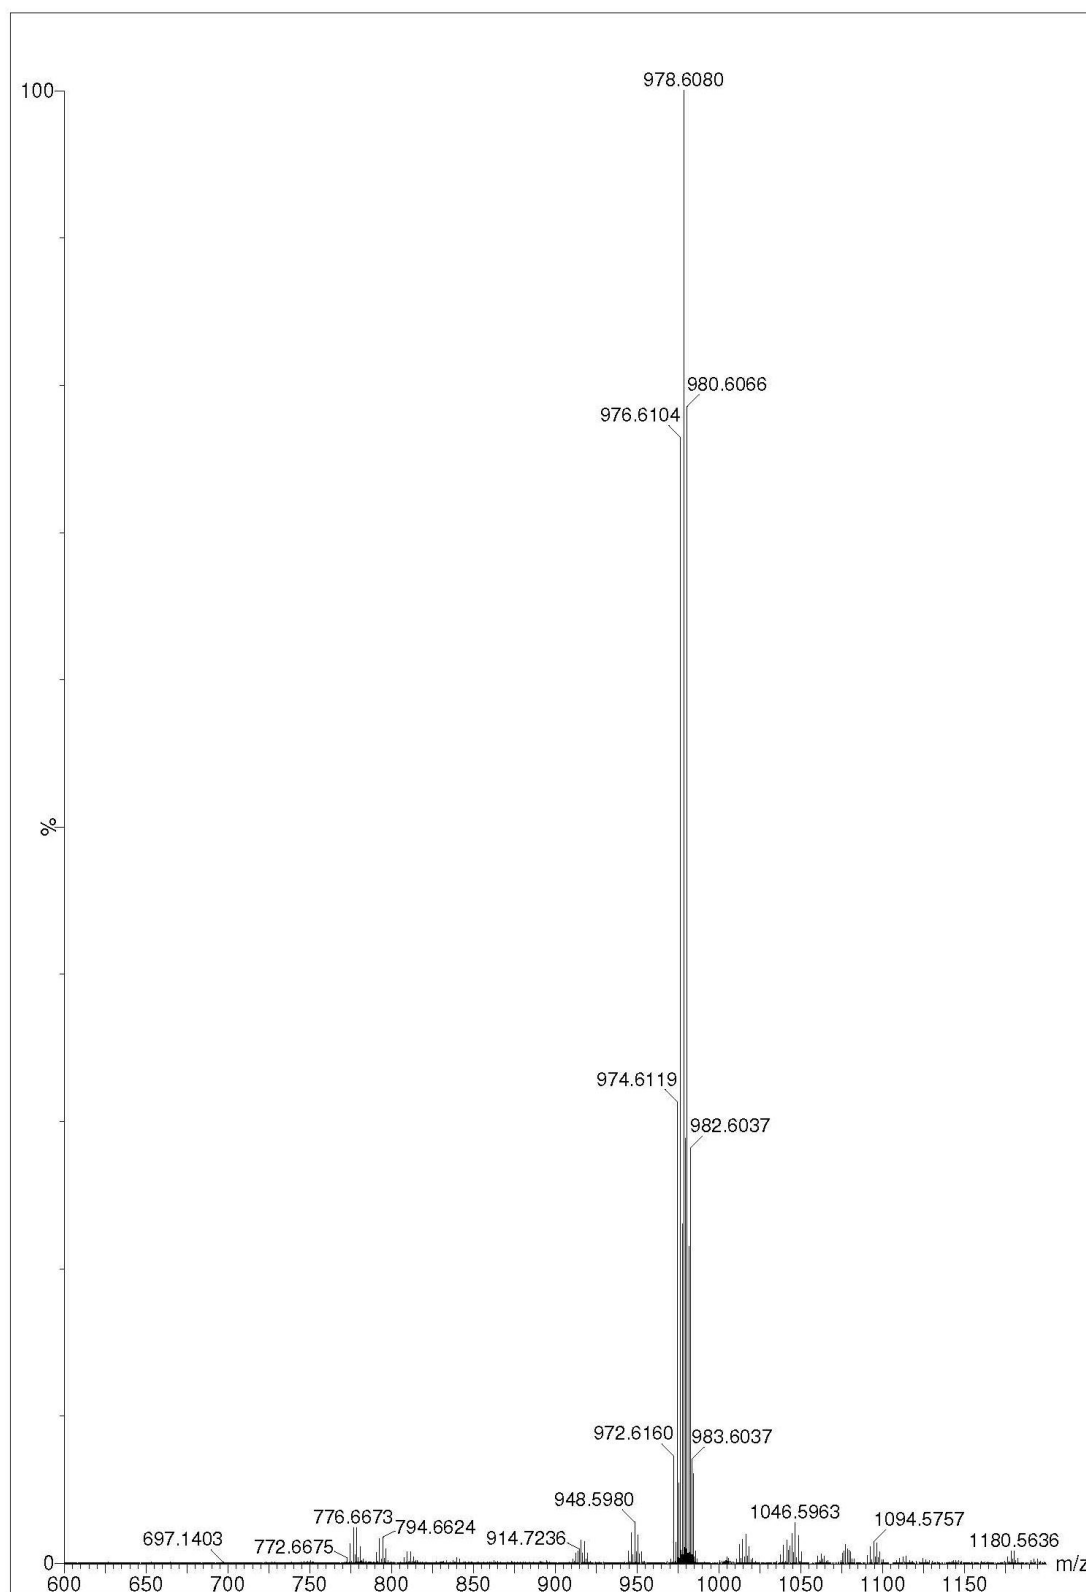

**Figure S2.** Proton NMR spectrum of **2** (black annotations from Scheme 1) and **4** (blue annotations) in methanol- $d_4$  with Wet suppression on the water resonance.

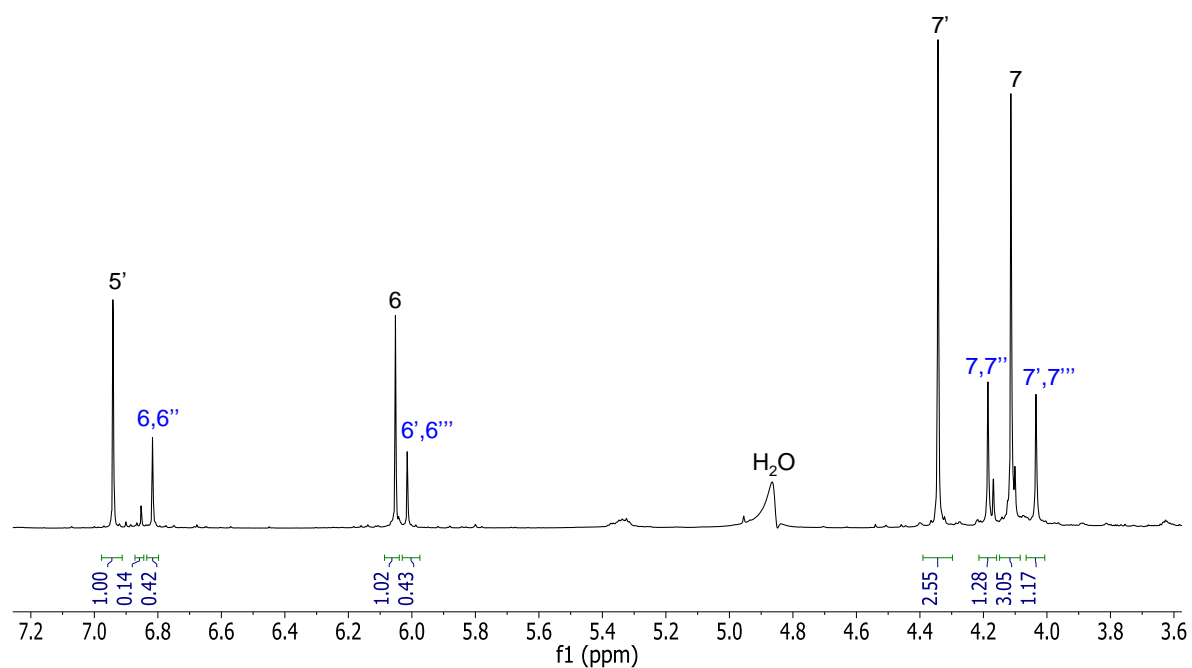

**Figure S3.** Proton decoupled Carbon NMR spectrum of **2** (black annotations from Scheme 1) and **4** (blue annotations).

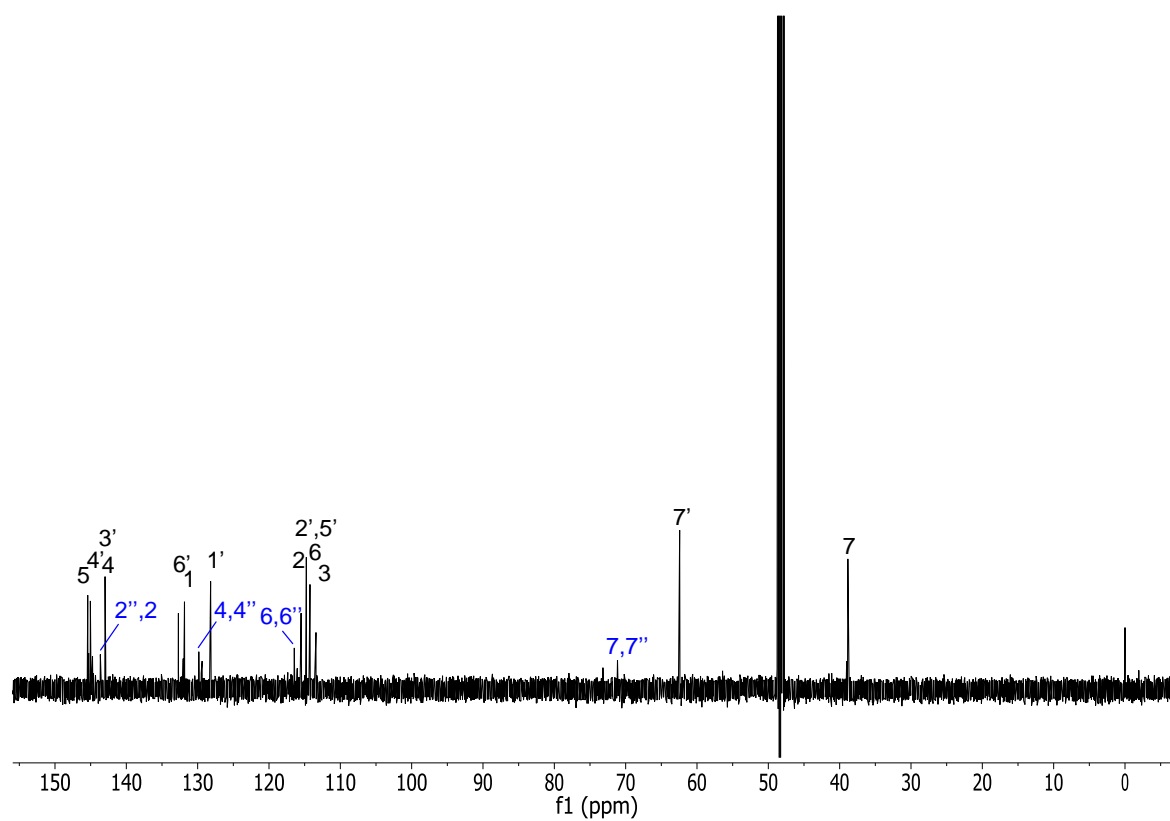

**Figure S4.** Superimposed gradient selected HSQC and HMBC spectra of **2** (black annotations from Scheme 1) and **4** (blue annotations).

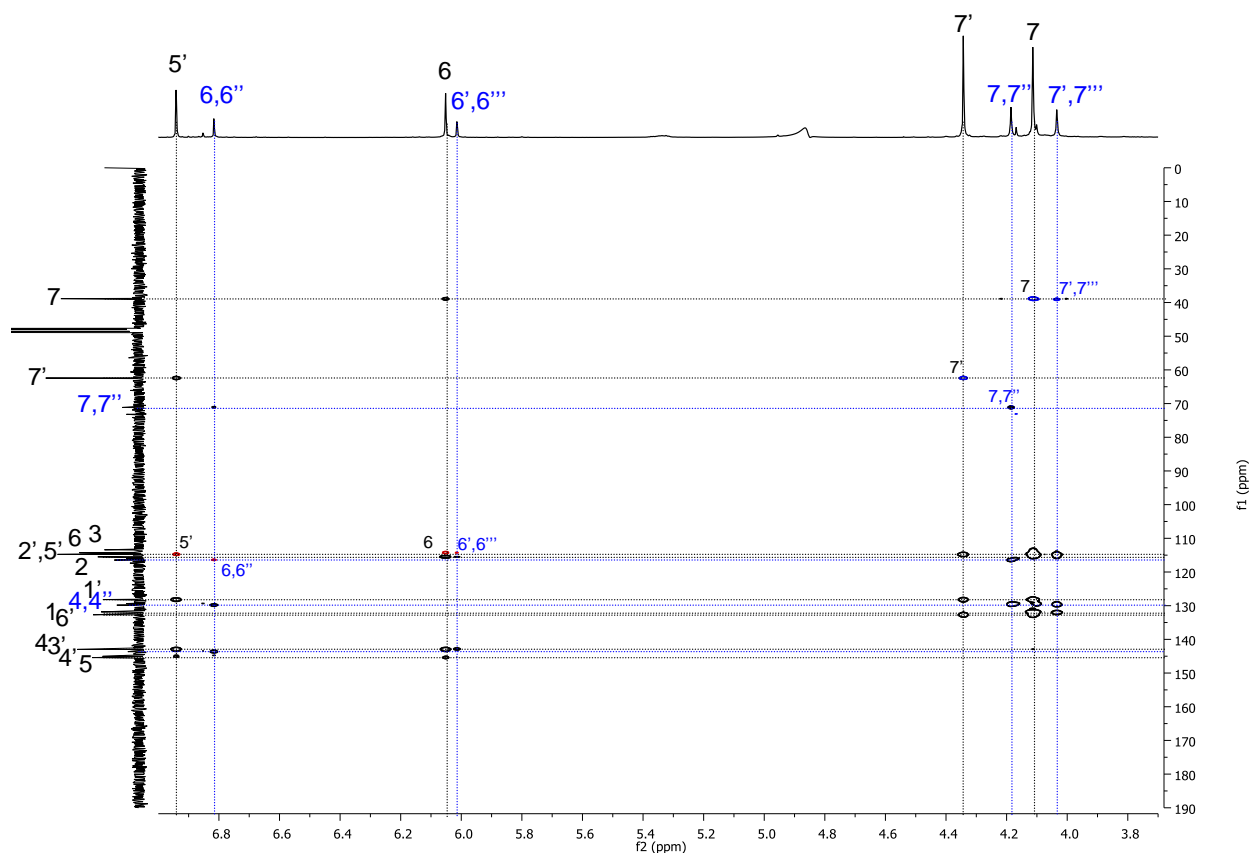

**Figure S5.** Superimposed gradient selected HSQC and HMBC spectra zooming in on the overlapped  $^1J_{CH}$  (blue) and  $^3J_{CH}$  (black) correlations of the two symmetric methylenes at position 6 for compound **4**, distinctive for the dimerization.

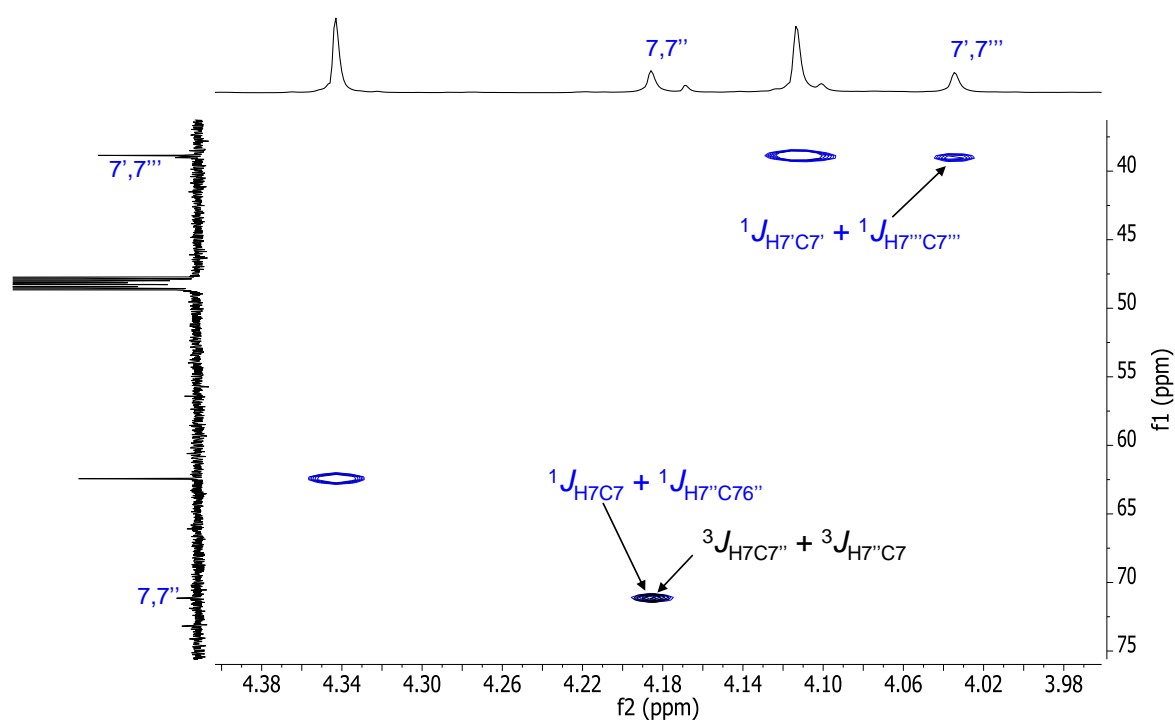

Supplement: Supplementary File 1 — Supplementary (PDF, 322 KB) [file marinedrugs-11-02769-s001.pdf]
